1 **TITLE:** Post-operative morbidity and mortality in Indigenous Peoples: A scoping review and meta-analysis  
2

3 **AUTHORS:** Rachel J Livergant, MBT<sup>1</sup>; Kelsey Stefanyk BSc;<sup>2</sup> Catherine Binda, BScH<sup>3</sup>; Georgia Fraulin,  
4 BScH<sup>1</sup>; Sasha Maleki, RPh;<sup>4</sup> Sarah Sibbeston, BSc<sup>1,5</sup>; Shahrzad Joharifard, MPH, FRCSC, FACS<sup>6</sup>, Tracey  
5 Hillier, FRCPC<sup>7</sup>; Emilie Joos, FRCSC, FACS<sup>8\*</sup>.  
6  
7  
8

- 9 1. Faculty of Medicine and Dentistry, University of Alberta, Edmonton, Alberta, Canada.
  - 10 2. Faculty of Medicine, University of British Columbia, Prince George, British Columbia, Canada.
  - 11 3. Faculty of Medicine, University of British Columbia, Terrace, British Columbia, Canada.
  - 12 4. Lower Mainland Pharmacy Services, Vancouver General Hospital, Faculty of Pharmaceutical  
13 Sciences, University of British Columbia, Vancouver, British Columbia, Canada.
  - 14 5. Northwest Territory Métis Nation, Yellowknife, Northwest Territories, Canada.
  - 15 6. Department of Pediatric and Thoracic Surgery, British Columbia Children's Hospital, University of  
16 British Columbia, Vancouver, Canada.
  - 17 7. Mi'kmaq Qalipu First Nation, Faculty of Medicine and Dentistry, University of Alberta, Edmonton,  
18 Alberta, Canada.
  - 19 8. Branch for Global Surgical Care, Division of General Surgery, Trauma and Acute Care Surgery,  
20 Vancouver General Hospital, University of British Columbia, Vancouver, British Columbia,  
21 Canada.
- 22

23 \*Corresponding author: Dr. Emilie Joos; Branch for Global Surgical Care, Division of General Surgery,  
24 Trauma and Acute Care Surgery, Vancouver General Hospital, University of British Columbia, Vancouver,  
25 British Columbia, 767 West 12th Avenue, Vancouver, British Columbia, V5Z 1M9, Canada; Tel: 604-875-  
26 4559; Fax: 604-875-5348; Email: [emilie.joos@vch.ca](mailto:emilie.joos@vch.ca)  
27

28 **Competing interests:** The authors have no conflicts to declare.

29 **Funding:** The authors received no specific funding for this work.  
30  
31  
32  
33  
34  
35  
36  
37  
38  
39  
40  
41

42 **ABSTRACT**

43  
44 Indigenous Peoples across North America and Oceania experience worse health outcomes compared to  
45 non-Indigenous people, including increased post-operative morbidity and mortality. No data is available  
46 on global differences in surgical morbidity and mortality between geographic locations and across surgical  
47 specialties. The aim of this study is to evaluate disparities in post-operative morbidity and mortality  
48 between Indigenous and non-Indigenous populations. This scoping review and meta-analysis was  
49 conducted in accordance with PRISMA-ScR and MOOSE guidelines. Eight electronic databases were  
50 searched with no language restriction. Studies reporting on Indigenous populations outside of Canada,  
51 the USA, New Zealand, or Australia, or on interventional procedures were excluded. Primary outcomes  
52 were post-operative morbidity and mortality. Secondary outcomes included reoperations, readmission  
53 rates, and length of hospital stay. The Newcastle Ottawa Scale was used for quality assessment. Eighty-  
54 four unique observational studies were included in this review. Of these, 67 studies were included in the  
55 meta-analysis (Oceania n=31, North America n=36). Extensive heterogeneity existed among studies and  
56 50% were of poor quality. Indigenous patients worldwide had 1.26 times higher odds of post-operative  
57 morbidity (OR=1.26, 95% CI: 1.10-1.44, p<0.01) and 1.34 times higher odds of post-operative infection  
58 (OR=1.34, 95% CI: 1.12-1.59, p<0.01) than non-Indigenous patients. Indigenous patients also had 1.33  
59 times higher odds of reoperation (OR=1.33, 95% CI: 1.02-1.74, p=0.04) and longer hospital stays  
60 (SMD=0.09; 95% CI: 0.02-1.08; p=0.05). In conclusion, we found that Indigenous patients experience  
61 significantly poorer surgical outcomes than their non-Indigenous counterparts. Additionally, there remains  
62 a paucity of high-quality research focusing on assessing and improving surgical equity for Indigenous  
63 patients worldwide, despite multiple international and national calls to action for reconciliation and  
64 decolonization to improve access to quality surgical care for Indigenous populations.

65  
66  
67  
68  
69  
70  
71  
72  
73  
74  
75  
76  
77  
78  
79  
80  
81  
82  
83  
84  
85  
86  
87  
88  
  
89  
90

## 91 INTRODUCTION

92 Safe and appropriate surgical care is an integral component of an effective and resilient healthcare  
93 system [1]. Surgical conditions account for over 33% of the global disease burden [2]. Unfortunately,  
94 access to surgical care is not equitable, with populations in low-income countries, rural environments, and  
95 certain underserved populations receiving a lower quality of surgical care or no surgical care at all [1].  
96 Indigenous Peoples are a grossly underserved population worldwide [3-5]. Although definitions of the  
97 term “Indigenous” are varied and nuanced, including populations across all continents, throughout this  
98 review we use the term Indigenous to refer to the original peoples, communities, and nations of the  
99 regions now called Canada, Australia, New Zealand, and the United States of America (USA). These  
100 populations hold and practice cultural, economic, political, and social traditions that are distinct from the  
101 broader settler population in which they live and seek recognition and sovereignty to practice these ways  
102 and identities [6]. Indigenous Peoples have not shared in the gains that development has provided these  
103 countries thus far, resulting in profound health and social inequities between Indigenous and non-  
104 Indigenous populations that continue to persist due to the ongoing effects of colonization and systemic  
105 racism [7-11].

106 An estimated 7 million of the 370 million Indigenous people worldwide live in Canada, Australia, New  
107 Zealand, and the USA [7]. The shared history of the British settler colonial project in these nations can be  
108 used as a framework to highlight commonalities in the contemporary situation of Indigenous Peoples in  
109 these areas [12]. For instance, Canada, Australia, New Zealand, and the USA were the only United  
110 Nations member countries to vote against The United Nations Declaration on the Rights of Indigenous  
111 Peoples (UNDRIP) upon its introduction in 2007 [13].

112 However, current literature on post-operative outcomes in Indigenous patients in Canada, Australia, New  
113 Zealand, and the USA, among other countries, remains limited and of poor quality [14]. Higher rates of  
114 death and adverse events post-operatively have been demonstrated for Indigenous Peoples, including  
115 increased surgical infections, need for re-operation, and longer length of hospital stay (LOS) compared to  
116 non-Indigenous patients [14-17].

117 To date, there is no known study that combines data on both post-operative morbidity and mortality from  
118 the continents where minority Indigenous populations experience similar disparities in healthcare  
119 provision. Additionally, no study compares and assesses morbidity and mortality for Indigenous patients  
120 across multiple surgical disciplines and procedures. This scoping review aims to assess if surgical  
121 morbidity and mortality disparities exist between Indigenous and non-Indigenous peoples in Canada,  
122 Australia, New Zealand, and the USA to better understand the extent of existing surgical and health  
123 disparities worldwide.

## 124 **METHODS**

126 This scoping review and meta-analysis was registered in Open Science Framework ([osf.io/qs3vz](https://osf.io/qs3vz)) and  
127 reported in accordance with Preferred Reporting Items for Systematic Review and Meta-Analysis-  
128 Extension for Scoping Reviews (PRISMA-ScR) and Meta-Analysis of Observational Studies in  
129 Epidemiology guidelines (S1 Appendix) [18,19].

### 130 **Data Sources and Searches**

131 A search strategy was developed in consultation with a professional research librarian. Comprehensive  
132 electronic database searches were undertaken in MEDLINE, Embase, Global Health, Cochrane Library,  
133 PsycInfo, SOCIndex, Web of Science, and ProQuest Dissertations & Theses Global from inception to  
134 December 25, 2022, using key MeSH terms (S2 Appendix). All languages were included. Reference lists  
135 of reviews and retrieved articles and consultations with experts were conducted to identify additional  
136 relevant studies.

### 137 **Study Selection and Criteria**

138 Two reviewers independently screened titles, abstracts, and full texts using Covidence. Discrepancies  
139 were resolved via consensus. We included clinical studies on surgical outcomes in Indigenous  
140 populations. Studies were excluded if they were book chapters, conference abstracts, or non-peer  
141 reviewed articles. Studies were excluded if they focused on Indigenous populations outside of Canada,  
142 Australia, New Zealand, or the USA, if they lacked a non-Indigenous comparator group, or if they included

143 only pediatric patients, as defined in study methods. Studies describing minor interventions and  
144 procedures, such as colonoscopy or angiography, were excluded.

145 While we recognize the importance of accounting for the numerous and varied Indigenous populations  
146 across the world, we restricted this study's geography to limit the already heterogeneous nature of our  
147 data. Furthermore, we hope to avoid over-homogenizing the distinct lived experiences of Indigenous  
148 Peoples in regions such as Africa, Northern Europe, and Central/South America. Canada, Australia, New  
149 Zealand and the USA share similar British colonial settler histories and consequent displacement and  
150 oppression of native people [7, 20-22].

### 151 **Data Extraction and Quality Assessment**

152 One reviewer completed data extraction and quality assessment (QA), while another verified the  
153 extracted data and QA findings. Discrepancies were resolved through consensus. The following data  
154 were extracted from included studies using Microsoft Excel (Microsoft Corporation, Version 16.60):  
155 authors' name, journal, year of publication, age category, population size, sex, type of study, database,  
156 surgical specialty, operations, outcomes of interest, and study conclusions. "Outcomes of interest"  
157 included mortality, any morbidity, length of hospital stay, and readmission and reoperation rates. Studies  
158 were included in data extraction if they reported surgical procedures and at least one outcome of interest  
159 resulting from the procedure. Studies reporting on two separate Indigenous groups had data extracted  
160 independently for each unique group. QA was conducted using the Newcastle-Ottawa Scale (NOS),  
161 adapted for observational studies [23]. To assess the risk of publication bias, the effect odds ratio (OR)  
162 for each of the included studies was plotted against their standard error on a logarithmic scale to produce  
163 a funnel plot, which were assessed for asymmetry.

### 164 **Data Analysis**

165 A random-effects model was used to define all pooled outcome measures and the OR was estimated with  
166 its variance and 95% confidence interval (CI). The prevailing heterogeneity between ORs for comparable  
167 outcomes between different studies was calculated using the I-squared inconsistency test. The absence  
168 of statistical heterogeneity is indicated by a value of 0%, whereas larger values indicate increasing

169 heterogeneity. Studies were only eligible for inclusion in meta-analysis if data were reported from which  
170 summary associations and their 95% CIs could be calculated. All meta-analyses were carried out using  
171 Review Manager Version 5.4 (Cochrane Collaboration, 2020).

172 Outcomes from studies were separated into three categories: 1) post-operative morbidity, 2) post-  
173 operative mortality, and 3) hospital stay. Morbidity included surgical and systemic infections,  
174 hematologic/thromboembolic, cardiovascular, pulmonary, genitourinary, immunologic, and procedure-  
175 specific post-operative complications (ileus, nerve injury, anesthetic complication, prosthesis-related  
176 complications, etc). Overall morbidity included all morbidities listed above pooled together, including  
177 those defined as "operative complications". Mortality was divided into two categories: 1) in-hospital and  
178 30-day mortality (<30-day mortality) and 2) greater than 30-day mortality (>30-day mortality), which  
179 included mortality and survival. Overall mortality refers to both <30-day and >30-day mortality pooled  
180 together. Hospital outcomes included readmission, reoperation, and length of hospital stay (LOS).  
181 Subgroup analyses were conducted based on surgical speciality, type of operation, geography, and  
182 quality of study. We also conducted a sub-group analysis by date of publication (before January 1st 2017  
183 versus after January 1st 2017). This publication period sub-group analysis was done to compare studies  
184 before and after both declarations for Indigenous rights were published in North America (Truth and  
185 Reconciliation Commission (TRC), Canada, 2015; American Declaration of the Rights of Indigenous  
186 Peoples (ADRIP), USA, 2016) to see if we could detect a difference in surgical outcomes over time,  
187 specifically after increased advocacy for Indigenous people on this continent [24,25]. Sensitivity analysis  
188 compared fixed effects to random effects models to test the assumption that the random effects method  
189 was the most appropriate choice. A study could contribute to more than one analysis if it reported on  
190 multiple outcomes (i.e., overall morbidity AND surgical site infections AND mortality analyses).

## 191 **RESULTS**

192

### 193 **Study Selection and Characteristics**

194

195 A PRISMA-ScR flow diagram outlining the scoping review process is presented in Figure 1. The initial  
196 search resulted in a total of 11423 non-duplicate studies, of which 697 were included in full-text review  
197 after title and abstract review. Following full-text review, expert consultations, and relevant review

198 appraisal for additional relevant articles, 105 unique studies met inclusion criteria. Twenty-one studies  
199 were multiple publications, meaning they reported findings on the same cohort as another study included  
200 in this review. We chose to report data only from the original study, or from the study that covered the  
201 most extensive cohort, to prevent repetition of data points, and multiple publications were not included in  
202 the meta-analysis or narrative review.

203  
204 **Fig 1.** PRISMA-ScR flow diagram of study selection process, inclusions, and exclusions.  
205

206 Of the 84 studies included in the narrative synthesis, 36 were retrospective cohort studies, 7 were  
207 prospective cohort, 4 were case-control, and 36 were cross-sectional. A comprehensive summary of  
208 findings and characteristics of all included studies are presented in Table 1 and S1 Table. For a complete  
209 list of references, see S3 Appendix.

210 Studies were published between 1989 and 2021, with research conducted from 1971 to 2019. A total of  
211 37 studies were published over the first 28 years (1989-2016), while 45 were published in the last 5 years  
212 (2017-2021). 36/84 (42.9%) studies were based in Oceania (22/36 (61.1%) in Australia and 14/36  
213 (38.9%) in New Zealand) while 48/84 (57.1%) studies were based in North America (38/48 (79.2%) in  
214 USA and 10/48 (20.8%) in Canada). Surgical outcomes were reported for 9,758,892 patients across 9  
215 surgical specialties, including General Surgery (n=22 studies), Orthopedic Surgery (n=15 studies),  
216 Cardiac Surgery (n=15 studies), Urology (n=1 studies), Obstetrics and Gynecology (n=5 studies),  
217 Neurosurgery (NS) (n=5 studies), Vascular Surgery (n=4 studies), Ears, Nose, and Throat (ENT) (n=1  
218 studies), and Ophthalmology (n=2 studies). Fourteen studies reported surgical outcomes from multiple  
219 surgical specialties. A breakdown of procedures can be found in S2 Table.

220 A total of 9,758,892 patients across 67 studies were included in the meta-analysis, of which 69,080  
221 (0.7%) were Indigenous and 7,111,3091 (99.3%) were non-Indigenous. Indigenous populations consisted  
222 of Native American (n=53,205, 77.0%), Māori (n=8,194, 11.9%), Aboriginal Australians and Torres Strait  
223 Islanders (n=4,590, 6.6%), and Indigenous Canadians (n=2,311, 3.3%). Some studies grouped  
224 Indigenous populations together, reporting on Māori and Pacific Islanders (n=159, 0.2%), or Native  
225 Hawaiian and Native American groups (n=666, 1.0%).

226 **Table 1.** Study and patient characteristics.

| <b>Study Characteristics</b>             | <b>No. of Studies</b> | <b>No. of Indigenous patients/Total *</b> | <b>Patient Characteristics</b>      | <b>No. of patients in MA/Total*</b> |
|------------------------------------------|-----------------------|-------------------------------------------|-------------------------------------|-------------------------------------|
| <b>Publication Year</b>                  |                       |                                           | <b>Sex</b>                          |                                     |
| 1991 and earlier                         | 1                     | 1,327/37,383                              | Male                                | 4,260,219/9,758,892                 |
| 1992-1996                                | 0                     | 0/0                                       | Female                              | 3,457,124/9,758,892                 |
| 1997-2001                                | 2                     | 91/1,423                                  | Other or Not Defined                | 2,041,549/9,758,892                 |
| 2002-2006                                | 4                     | 757/2,100**                               | <b>Ethnicity</b>                    | <b>No. patients in MA/Total*</b>    |
| 2007-2011                                | 8                     | 3,085/8,932                               | Indigenous                          | 69,080/9,758,892                    |
| 2012-2016                                | 22                    | 22,364/2,597,604                          | Indigenous Canadians**              | 2,311/55,528                        |
| 2017-2021                                | 45                    | 168,031/20,459,986                        | Native                              | 53,205/9,386,794                    |
| <b>Study Design</b>                      |                       |                                           | American Native                     | 666/153,687                         |
| RCS                                      | 36                    | 33,490/2,588,888                          | American & Native                   |                                     |
| PCS                                      | 7                     | 943/12,545                                | Hawaiian                            |                                     |
| CC                                       | 4                     | 1,069/2,169                               | Māori                               | 8,149/80,195                        |
| CS**                                     | 36                    | 54,672/17,733,558                         | Māori/PI                            | 159/429                             |
| Mixed                                    | 1                     | 84/217                                    | Aboriginal                          | 4,590/82,259                        |
| <b>Study Location</b>                    |                       |                                           | Australian & Torres Strait Islander |                                     |
| North America                            | 48                    | 77,102/2,016,427                          | Non-Indigenous                      | 7,111,309/9,758,892                 |
| Canada                                   | 10                    | 22,134/1,056,810                          |                                     |                                     |
| USA                                      | 38                    | 54,968/19,106,617                         |                                     |                                     |
| Oceania                                  | 36                    | 6,580/102,295                             |                                     |                                     |
| Australia                                | 22                    | 4,762/84,439                              |                                     |                                     |
| New Zealand                              | 14                    | 1,818/17,856                              |                                     |                                     |
| <b>Primary Studies in MA by Location</b> |                       |                                           |                                     |                                     |
| Canada                                   | 8                     | 2,311/55,528                              |                                     |                                     |
| USA                                      | 28                    | 53,871/9,540,481                          |                                     |                                     |
| Australia                                | 20                    | 4,628/82,349                              |                                     |                                     |
| New Zealand                              | 11                    | 1,694/8,879                               |                                     |                                     |
| <b>Surgical Specialities</b>             |                       |                                           |                                     |                                     |
| Cardiac Surgery                          | 15                    | 23,239/3,567,387                          |                                     |                                     |
| ENT                                      | 1                     | 37/93                                     |                                     |                                     |
| General Surgery                          | 22                    | 15,866/3,232,446                          |                                     |                                     |
| Neurosurgery                             | 5                     | 306/15,373                                |                                     |                                     |
| OBGYN                                    | 5                     | 1,916/261,992                             |                                     |                                     |
| Ophthalmology                            | 2                     | 115/8,645,453                             |                                     |                                     |
| Orthopedic Surgery                       | 15                    | 41,480/4,096,667                          |                                     |                                     |
| Urology                                  | 1                     | 1,157/284,050                             |                                     |                                     |
| Vascular Surgery                         | 4                     | 497/8,027                                 |                                     |                                     |
| Multiple                                 | 14                    | 5,645/225,889                             |                                     |                                     |

227  
 228 \*Total represents Indigenous + non-Indigenous patients (comparator group) in studies \*\*A study by Hong  
 229 et al. (2006) [26] did not distinguish between Indigenous and non-Indigenous population numbers (total n  
 230 = 1,122) CC: Case-Control; CS: Cross-Sectional; ENT: Ears, Nose, Throat; NH: Native Hawaiian;



231 OBGYN: Obstetrics & Gynecology; PI: Pacific Islander; PCS = Prospective Cohort Study; RCS =  
232 Retrospective Cohort Study.  
233  
234

### 235 **Risk of Bias Assessment and Sensitivity Analyses**

236 Half of included studies (42/84, 50%) were low quality and the other half (42/84, 50%) were good quality  
237 (S4 Appendix). The low quality of studies was mainly attributed to failure of studies to control for  
238 confounders such as age, pre-existing comorbidities, and/or sex (40/42; 95.2%). Funnel plots for each  
239 outcome were generated, however due to the inherent heterogeneity of the studies included in each  
240 outcome category, asymmetry could not be reliably assessed (S5 Appendix). No noticeable change in the  
241 direction of the effect with a fixed effects method was appreciated, therefore a random effects model was  
242 used.

### 243 **Post-Operative Morbidity**

244 Fifty-four studies provided data on post-operative morbidity. Of these, 48 were included in the meta-  
245 analysis and 6 were included in the narrative synthesis. Overall, there was a significantly increased  
246 morbidity for the Indigenous cohort (OR=1.26, 95% CI: 1.10-1.44, p=0.001). When low quality studies  
247 were excluded, there was 1.30 increased odds of post-operative morbidity among Indigenous compared  
248 to non-Indigenous patients (OR=1.30, 95% CI:1.12-1.51, p<0.001) (Fig 2). [29-50] When stratified by  
249 country, overall post-operative morbidity remained significantly higher in Indigenous groups from Australia  
250 (OR=1.42, 95% CI: 1.07-1.90, p=0.02) and New Zealand (OR=1.63, 95% CI: 1.09-2.43, p=0.02)  
251 compared to non-Indigenous, but there was no significant difference in overall morbidity between  
252 Indigenous and non-Indigenous patients from Canada (OR=1.71, 95% CI: 0.90-3.24, p=0.10) nor the  
253 USA (OR=1.07, 95% CI: 0.87-1.32, p=0.53).

254  
255 When separated by surgical specialty, urology (OR=1.79, 95% CI:1.32-2.41, p<0.001) and cardiovascular  
256 surgery (OR=1.42, 95% CI: 1.11-1.82, p=0.005) had increased overall morbidity in Indigenous patients.  
257 Specifically, renal transplants (OR=1.97, 95% CI:1.34-2.89, p<0.001) and coronary artery bypass grafts  
258 (OR=1.50, 95% CI: 1.27-1.76, p <0.001) both resulted in significantly higher post-operative complications

259 for Indigenous patients. No significant differences in overall morbidity were found in other surgical  
260 specialties or procedures. All results for overall morbidity and mortality meta-analyses can be found in  
261 Table 2.

262  
263 Twenty studies reported morbidity outcomes prior to 2017 and 28 reported morbidity outcomes between  
264 January 2017 and December 2021. Before 2017, there was significantly more overall morbidity among  
265 Indigenous patients (OR=1.42, 95% CI: 1.14-1.76, p=0.002); after 2017, on the other hand, there was no  
266 significant difference in overall morbidity (OR=1.17, 95% CI: 0.98-1.40, p=0.09). All other meta-analyses  
267 results are in S3 Table.

268  
269 Of the six studies reporting morbidity outcomes from narrative analysis, four studies reported no  
270 significant differences between Indigenous and non-Indigenous patients [51-54]. The other two found  
271 significantly increased functional deficits and infection rates for the Indigenous populations [55, 56].

272  
273 **Fig 2. Meta-analysis of overall morbidity with good quality studies**

274 Results are depicted for meta-analysis using a random-effects model for odds of overall morbidity post-operatively between  
275 Indigenous and non-Indigenous surgical patients. Overall morbidity included any post-operative complication including surgical  
276 infection, systemic infection, cardiovascular complication, pulmonary complication, hematologic/thromboembolic complication,  
277 genitourinary complication, immunologic complication, and/or procedural complication. This analysis was conducted using good  
278 quality observational studies, as determined by Newcastle Ottawa Scale ratings.

279  
280 *Surgical and Systemic Infections*

281  
282 Surgical site and systemic infection data were included in 29 unique studies. Indigenous patients had  
283 1.34 times increased odds of post-surgical infections compared to non-Indigenous patients (OR=1.34,  
284 95% CI: 1.12-2.59, p=0.001). When stratified by continent, North American Indigenous Peoples had 1.33  
285 times increased odds of post-surgical infections compared to non-Indigenous North Americans (OR=1.33,  
286 95% CI: 1.10-1.60, p=0.003) (Figure 3a) [30,31,36,39,40,42-44,47,48,57]. When stratified by country, only  
287 Indigenous Peoples from the USA experienced significant disparities in surgical infection rates (OR=1.36,  
288 95% CI: 1.06-1.74, p=0.01). There were no differences in post-operative systemic infections detected in  
289 the analyses. There were no significant differences in post-operative surgical site infections (OR=1.16,  
290 95% CI: 0.90-1.49, p=0.24) or systemic infections (OR=1.01, 95% CI: 0.58-1.75, p=0.98) in studies  
291 published before 2017. In studies published after 2017, there was a significant increase in surgical site

292 infections for Indigenous patients (OR=1.5, 95% CI: 1.16-1.95, p=0.002), but not in systemic infections  
293 (OR=1.01, 95% CI:0.92-1.10, p=0.88).

294  
295 *Other Post-Operative Complications*

296  
297 Indigenous Peoples had higher odds of pulmonary complications if all studies were included (OR=1.42,  
298 95% CI: 1.03-1.94; p=0.03, Fig 3b). If only good quality studies were included, however, this difference  
299 was not significant (OR=1.32, 95% CI: 0.92-1.90, p=0.13). Patients undergoing cardiovascular surgery  
300 (OR=1.85, 95% CI:1.50-2.29, p<0.001) and Oceanic Indigenous patients undergoing any surgery  
301 (OR=1.64, 95% CI:1.25-2.17, p<0.001) had higher odds of pulmonary complications compared to non-  
302 Indigenous peoples. Furthermore, there was a significant increase in pulmonary complications in  
303 Indigenous patients in studies published prior to 2017 (OR=1.64, 95% CI:1.06-2.54, p=0.02), while this  
304 was not significant in studies published in the last five years (OR=1.22, 95% CI:0.81-1.83, p=0.34). There  
305 were no geographic or surgical specialty differences between populations with respect to cardiovascular  
306 complications.

307  
308 Indigenous patients were significantly more likely to experience immunologic complications post-  
309 operatively (OR=1.53, 95% CI:1.08-2.17, p=0.02) (Fig 3c) [35,36,40,42,46]. Oceanic Indigenous Peoples  
310 (OR=2.35, 95% CI: 1.36-4.04, p=0.002) and those undergoing renal transplantation (OR=1.55, 95% CI:  
311 1.44-1.67, p<0.001) had higher odds of these complications. Furthermore, studies published in the last  
312 five years demonstrated a higher rate of immunologic complications for Indigenous patients (OR=1.48,  
313 95% CI:1.00-2.20), p=0.05) while this was not significant in studies published before 2017 (OR=1.96,  
314 95% CI:0.64-6.00, p=0.24). There were no significant differences in genitourinary (OR=1.21, 95% CI:  
315 0.92-1.60, p=0.18), hematologic (OR=1.28, 95% CI:0.97-1.70, p=0.08), or procedural complications  
316 (OR=0.96, 95% CI: 0.32-2.92, p=0.94) between Indigenous and non-Indigenous patients. Further  
317 subgroup analyses by geographic region, surgical specialty, quality of study, and publication period  
318 likewise did not demonstrate significant difference in these outcomes (S3 Table).

319  
320 **Fig 3. Meta-analyses with studies for post-operative (A) Surgical infections; (B) Pulmonary**  
321 **complications; and (C) Immunologic complications.**

322 Results are depicted for meta-analysis using a random-effects model for observational studies. A. post-operative surgical infections  
323 including superficial, organ space, and deep wound infections, wound dehiscence, abscess formation; B. pulmonary complications

324 including pneumonia, respiratory failure, and prolonged ventilation and C. immunologic complications including graft failure, delayed  
325 graft function, and graft rejection (acute, chronic).

### 326 **Post-Operative Mortality and Survival**

327  
328 Fifty studies provided information on post-operative mortality and/or survival. Of these studies, 40 were  
329 included in the meta-analysis, totalling 52,698 Indigenous and 5,057,266 non-Indigenous post-operative  
330 deaths. Overall mortality was similar for both Indigenous and non-Indigenous patients (OR=1.16, 95% CI:  
331 0.90-1.50, p=0.26), and there were no significant differences between the groups based on geography,  
332 surgical specialty, or quality of study (Table 2). Results of analysis on <30-day mortality (OR=1.20, 95%  
333 CI: 0.81-1.78, p=0.37) and >30-day mortality (OR=1.16, 95% CI: 0.95-1.41, p=0.15) demonstrated similar  
334 mortality rates for Indigenous and non-Indigenous patients. However, Oceanic patients (OR=1.29, 95%  
335 CI: 1.06-1.57, p=0.01), and more specifically, Māori and PI patients from New Zealand (OR=1.39, 95%  
336 CI: 1.01-1.92, p=0.04) had higher odds of >30-day mortality than non-Indigenous patients. Indigenous  
337 patients undergoing orthopedic surgeries and, more specifically, amputations, had increased odds of <30-  
338 day mortality versus non-Indigenous patients (OR=1.32, 95% CI: 1.08-1.61, p=0.006 and OR=1.40, 95%  
339 CI: 1.10-1.77, p=0.006). Of the 10 studies included in narrative analysis, only one found increased  
340 mortality rates for Indigenous patients (HR=1.15, 95% CI: 1.05-1.26, p= NR) [58]. There were no  
341 significant differences in overall mortality in studies published before (OR=1.28, 95% CI: 0.74-2.23,  
342 p=0.38) or after 2017 (OR=1.10, 95% CI: 0.86-1.40, p=0.46).

343  
344 **Table 2. Meta-Analysis for overall morbidity and mortality outcomes**

345

|           |                   |  | Number of Studies (n) | Indigenous Patients # Events/Total Population | Non-Indigenous Patients # Events/Total Comparator | Odds Ratio (95%CI), p-value |
|-----------|-------------------|--|-----------------------|-----------------------------------------------|---------------------------------------------------|-----------------------------|
| Mortality |                   |  |                       |                                               |                                                   |                             |
|           | Overall Mortality |  | 40                    | 1819/52693                                    | 97326/7522611                                     | 1.16 (0.90-1.50), p=0.26    |

|  |                        |    |            |               |                                 |
|--|------------------------|----|------------|---------------|---------------------------------|
|  | Good Quality Studies   | 20 | 1214/38854 | 53452/5998046 | 0.88<br>(0.67-1.14),<br>p=0.33  |
|  | Geographic Location    |    |            |               |                                 |
|  | Oceania                | 20 | 1144/11956 | 8363/135141   | 1.10<br>(0.90-1.34),<br>p=0.35  |
|  | Australia              | 13 | 493/3733   | 5883/73437    | 0.97<br>(0.72-1.29),<br>0.83    |
|  | New Zealand            | 7  | 651/8223   | 2480/61704    | 1.31<br>(0.96-1.78),<br>p=0.09  |
|  | North America          | 20 | 675/40742  | 88963/7387470 | 1.19<br>(0.72-1.97),<br>p=0.49  |
|  | Canada                 | 3  | 29/702     | 585/12445     | 0.68<br>(0.45-1.02),<br>0.07    |
|  | USA                    | 17 | 646/40040  | 88378/7375025 | 1.33<br>(0.76-2.31),<br>p=0.32  |
|  | Surgical Specialty     | 39 |            |               |                                 |
|  | Cardiovascular Surgery | 20 | 973/25933  | 33970/2517269 | 1.19<br>(0.98-1.44),<br>p=0.09  |
|  | General Surgery        | 11 | 425/12929  | 30593/3922657 | 0.90<br>(0.49-1.66),<br>p=0.74  |
|  | Orthopedic Surgery     | 4  | 210/11768  | 2060/792342   | 2.47<br>(0.46-13.40),<br>p=0.29 |

|  |                    |                           |           |                  |                     |                                          |
|--|--------------------|---------------------------|-----------|------------------|---------------------|------------------------------------------|
|  |                    | Urology                   | 4         | 68/1447          | 1778/192080         | 0.69<br>(0.36-1.33),<br>p=0.27           |
|  | Operation          |                           |           |                  |                     |                                          |
|  |                    | AAA Repair                | 3         | 170/753          | 1187/6745           | 1.16<br>(0.65-2.05),<br>p=0.62           |
|  |                    | <b>Amputation</b>         | <b>2</b>  | <b>433/1918</b>  | <b>882/4643</b>     | <b>1.40<br/>(1.10-1.77),<br/>p=0.006</b> |
|  |                    | Arthroplasty              | 3         | 54/11698         | 1900/792538         | 2.72<br>(0.30-24.42),<br>p=0.37          |
|  |                    | CABG +/- Valve Repair     | 10        | 149/2487         | 1996/70931          | 1.17<br>(0.84-1.61),<br>p=0.35           |
|  |                    | Malignant Tumor Resection | 5         | 430/4818         | 44146/865688        | 0.72<br>(0.48-1.08),<br>p=0.11           |
|  |                    | Transplants               | 6         | 114/380          | 821/1916            | 0.91<br>(0.57-1.45),<br>p=0.69           |
|  |                    | Valve Repair              | 3         | 71/539           | 477/3716            | 1.12<br>(0.85-1.47)<br>p=0.42            |
|  | Publication Period |                           |           |                  |                     |                                          |
|  |                    | 2017 and later            | 28        | 4465/45845       | 392634/5415927      | 1.17<br>(0.98-1.40),<br>p=0.09           |
|  |                    | <b>Before 2017</b>        | <b>20</b> | <b>1286/8742</b> | <b>22538/234689</b> | <b>1.42<br/>(1.14-1.76),<br/>p=0.002</b> |

|           |                             |                    |           |                   |                       |                                     |
|-----------|-----------------------------|--------------------|-----------|-------------------|-----------------------|-------------------------------------|
| Morbidity |                             |                    |           |                   |                       |                                     |
|           | <b>Overall Morbidity</b>    |                    | <b>48</b> | <b>5751/54587</b> | <b>415172/5650616</b> | <b>1.26 (1.10-1.44), 0.001</b>      |
|           | <b>Good Quality Studies</b> |                    | <b>22</b> | <b>3236/32771</b> | <b>273850/3743294</b> | <b>1.30 (1.12-1.51), p&lt;0.001</b> |
|           | Geographic Location         |                    |           |                   |                       |                                     |
|           |                             | <b>Oceania</b>     | <b>22</b> | <b>2244/23786</b> | <b>163548/2485269</b> | <b>1.46 (1.14-1.87), p=0.003</b>    |
|           |                             | <b>Australia</b>   | <b>16</b> | <b>2071/23098</b> | <b>163319/2484242</b> | <b>1.43 (1.06-1.92), p=0.02</b>     |
|           |                             | <b>New Zealand</b> | <b>6</b>  | <b>173/688</b>    | <b>229/1027</b>       | <b>1.60 (1.12-2.26), p=0.009</b>    |
|           |                             | North America      | 26        | 3507/30801        | 251624/3165347        | 1.15 (0.95-1.39), p=0.15            |
|           |                             | Canada             | 5         | 282/976           | 3056/15140            | 1.71 (0.90-3.24), p=0.10            |
|           |                             | USA                | 21        | 3225/248568       | 248568/3150207        | 1.07 (0.87-1.32), p=0.53            |
|           | Surgical Specialty          |                    |           |                   |                       |                                     |
|           |                             | All                | 2         | 395/2227          | 447/2382              | 0.93 (0.80-1.08), p=0.36            |

|  |           |                               |           |                   |                       |                                     |
|--|-----------|-------------------------------|-----------|-------------------|-----------------------|-------------------------------------|
|  |           | <b>Cardiovascular Surgery</b> | <b>15</b> | <b>2077/23313</b> | <b>162893/2490221</b> | <b>1.42 (1.11-1.82), p=0.005</b>    |
|  |           | ENT                           | 1         | 17/37             | 15/56                 | 2.32 (0.97-5.58), p=0.06            |
|  |           | General Surgery               | 11        | 656/9277          | 60002/951448          | 0.97 (0.84-1.12), p=0.67            |
|  |           | Neurosurgery                  | 1         | 12/175            | 191/4106              | 1.51 (0.82-2.76), p=0.18            |
|  |           | OBGYN                         | 3         | 46/1467           | 922/89475             | 2.24 (0.66-7.57), p=0.19            |
|  |           | Orthopedic Surgery            | 6         | 1084/13287        | 135413/1803467        | 0.68 (0.35-1.31), p=0.25            |
|  |           | <b>Urology</b>                | <b>9</b>  | <b>1464/4804</b>  | <b>55289/309461</b>   | <b>1.79 (1.32-2.41), p&lt;0.001</b> |
|  | Operation |                               |           |                   |                       |                                     |
|  |           | AAA Repair                    | 2         | 214/1239          | 27959/190732          | 1.15 (0.99-1.34), p=0.07            |
|  |           | Amputation                    | 2         | 26/91             | 56/327                | 0.41 (0.02-8.66), p=0.56            |
|  |           | Arthroplasty                  | 5         | 1068/13266        | 135390/1803444        | 0.75 (0.38-1.46), p=0.40            |



|  |                    |                                |          |                  |                     |                                     |
|--|--------------------|--------------------------------|----------|------------------|---------------------|-------------------------------------|
|  |                    | <b>CABG (+/-) Valve Repair</b> | <b>5</b> | <b>369/1805</b>  | <b>4240/50858</b>   | <b>1.50 (1.27-1.76), p&lt;0.001</b> |
|  |                    | Malignant Tumor Resection      | 3        | 177/3522         | 29443/616169        | 0.93 (0.79-1.08), p=0.33            |
|  |                    | <b>Renal Transplantation</b>   | <b>8</b> | <b>1273/3647</b> | <b>27370/118883</b> | <b>1.97 (1.34-2.89), p&lt;0.001</b> |
|  |                    | <b>Thyroidectomy</b>           | <b>3</b> | <b>37/405</b>    | <b>1146/13513</b>   | <b>1.72 (1.00-2.97), p=0.05</b>     |
|  |                    | <b>Transplantation</b>         | <b>9</b> | <b>1303/3882</b> | <b>27783/121609</b> | <b>1.77 (1.23-2.53), p=0.002</b>    |
|  |                    | Valve Repair                   | 3        | 77/539           | 771/3716            | 0.66 (0.25-1.74), p=0.40            |
|  | Publication Period |                                |          |                  |                     |                                     |
|  |                    | 2017 and later                 | 20       | 513/15200        | 49775/1586724       | 1.10 (0.86-1.400), p=0.46           |
|  |                    | Before 2017                    | 20       | 1819/52698       | 97326/7522611       | 1.28 (0.74-2.23), p=0.38            |

346  
 347 Results of meta-analysis of pooled results from observational studies reporting outcomes on overall morbidity and mortality (<30day  
 348 and >30day). Includes sub-group analysis by quality of study (good quality), geographic region (Oceania, North America), country,  
 349 surgical specialty, operation, and publication period (before 2017, 2017 and later). Indigenous outcomes represent all reported  
 350 Indigenous groups, including combining Pacific Islander, Māori and/or Native Hawaiian for relevant studies. AAA: Abdominal Aortic  
 351 Aneurysm; CABG: Coronary Artery Bypass Grafting; OBGYN: Obstetrics and Gynecology.  
 352

### 353 Hospital Stay Outcomes

354  
 355 Forty-five studies were included in the meta-analysis for hospital stay outcomes. There was a significant  
 356 increase in reoperation rates (OR=1.33, 95% CI: 1.02-1.74, p=0.04) and LOS for Indigenous patients

357 (SMD=0.15, 95% CI: 0.02-0.29, p=0.02). The difference in reoperation rates (OR=1.33, 95% CI: 1.02-  
358 1.74, p=0.03) and LOS (SMD=0.65, 95% CI: 0.14-1.16, p=0.01) before 2017 was statistically significant,  
359 while the difference in reoperation rates (OR=1.35, 95% CI: 0.61-2.97, p=0.46) and LOS (SMD=0.02,  
360 95% CI: -0.04-0.08, p=0.53) after 2017 was not statistically significant. Oceanic Indigenous patients had  
361 the highest odds of reoperation and longest LOS (SMD=0.54, 95% CI -0.00-1.08, p=0.05). There were no  
362 significant differences in readmission rates for either population group (S3 Table). The three studies  
363 included in narrative analysis did not report significant differences in hospital stay outcomes for  
364 Indigenous patients [51,53,60].

365

## 366 **DISCUSSION**

367

368 This study presents a comprehensive overview and summary of the state of post-operative outcomes for  
369 Indigenous populations worldwide. Our findings are consistent with existing literature that describes  
370 disparate post-operative outcomes for Indigenous patients [14,16]. Specifically, this study presents  
371 evidence that Indigenous patients in Canada, the USA, Australia, and New Zealand experience greater  
372 post-operative morbidity, including infections and other systemic complications, than their non-Indigenous  
373 counterparts. We also found that long-term mortality was significantly increased for Indigenous patients  
374 from New Zealand, echoing existing literature [61,62]. Additionally, this study highlighted a high proportion  
375 of low-quality studies on the topic, as well as a very low representation of Indigenous patients in  
376 published research, which is a call to action for researchers to scrutinize this topic more thoroughly.

377 Specifically, this study found that Indigenous people in Australia and New Zealand had significantly higher  
378 post-operative morbidity and mortality compared to non-Indigenous peoples. These differences were not  
379 statistically significant in Canadian and American populations. However, previous studies, with differing  
380 inclusion and exclusion criteria, have highlighted disparities between Indigenous and non-Indigenous  
381 surgical outcomes in Canada and the USA [16,65].

382

383 On an international stage, the UNDRIP was adopted by the UN General Assembly in 2007 to protect  
384 Indigenous Peoples worldwide, including enshrining the right of Indigenous Peoples “without  
385 discrimination, to ... health and social security” [13]. As previously mentioned, Canada, the USA,

386 Australia, and New Zealand were the only four countries to vote against this Declaration in 2007 [13].  
387 However, all four countries have since ratified and given their support for the Declaration, as well as  
388 adopted their own national frameworks [24,25]. On a national level in North America, the TRC and  
389 ADRIP called on the healthcare sector to recognize, measure, and close the gaps in Indigenous health  
390 outcomes [24,25]. To date, these calls to actions have not meaningfully improved the reporting of  
391 Indigenous health outcomes in the North American context, as evidenced by the preponderance of low-  
392 quality studies retrieved in this study and the trend of increased post-operative infections and  
393 immunological complications in Indigenous patients in the last five years. However, other metrics of post-  
394 operative morbidity have improved in the last five years, such as non-significant differences in overall  
395 morbidity, hospital LOS, and reoperation rates for Indigenous patients. These conflicting results illustrate  
396 that it remains to be seen if the TRC, UNDRIP, and/or ADRIP will lead to the structural changes needed  
397 in healthcare systems to ameliorate surgical inequities for Indigenous patients.

398  
399 On a more positive note, there demonstrably has been more interest in studying these inequities, as  
400 evidenced by the exponential rise in publications centered on this topic and inclusion of Indigenous  
401 patients in studies since these legislations have been adopted. In our study, we found that the publication  
402 rate doubled over the last decade, from 22 in 2012-2016 to 45 in 2017-2021, and that this translated into  
403 a seven-fold increase in the Indigenous population studied (22,364 vs 168,031 patients). In the USA,  
404 many of these publications were made possible thanks to the harnessing of data and statistical power  
405 from the National Surgical Quality Improvement Program (NSQIP), created by the American College of  
406 Surgeons (ACS) [66]. However, despite Canadian institutions having access to NSQIP since as early as  
407 2011, none of the Canadian studies utilized NSQIP, which may partially explain the poor quality of studies  
408 from Canada (n=6/9, 66.7%) compared to the USA (n=15/39, 38.5%). One possible explanation for the  
409 lack of NSQIP utilization in the Canadian context may be that the Canadian NSQIP databases do not  
410 record ethnicity/race data, while this information is recorded in USA databases. This demonstrates a lack  
411 of appropriate tools for measuring health equity, despite call to action 19 from the TRC of Canada that  
412 states “we call upon the federal government, in consultation with Aboriginal peoples, to establish  
413 measurable goals to identify and close the gaps in health outcomes between Aboriginal and non-  
414 Aboriginal communities, and to publish annual progress reports and assess long term trends” [24].

415 Collecting and recording Indigenous status in national databases would directly help address this call to  
416 action, and we recommend re-visiting current Canadian policies against collecting ethnicity data in order  
417 to better analyze differences in healthcare outcomes between various ethnic groups.

418  
419 Systemic racism and discrimination are prevalent in post-colonial health systems. These factors likely  
420 contribute to the observed disparities in surgical outcomes in this study, rather than Indigenous culture  
421 itself [67,68]. Institutions, including healthcare systems, created by settlers were designed to benefit the  
422 colonizers and disadvantage original inhabitants. Indigenous Peoples around the world were purposefully  
423 exposed to infectious diseases, denied treatments, experienced forced sterilization, and were banned  
424 from practicing their traditional ways of healing [69,70]. We must acknowledge the ongoing effects that  
425 colonization contributes to the current and lasting socioeconomic marginalization and consequent health  
426 care disparities experienced by Indigenous populations globally [71,72]. In this way, we can confront and  
427 begin to close these gaps. As a global surgical community, it is essential to reimagine models of surgical  
428 care that confront the impacts of colonialism on underserved populations. Reimagining surgical models to  
429 comprehensively integrate contextualized, longitudinal, and community-centric methods that meet the  
430 unique needs of Indigenous patients may help to diminish these gross surgical disparities and improve  
431 the health of Indigenous patients.

### 432 433 **Limitations**

434  
435 The heterogeneity among surgical specialties, geographies, and distinct Indigenous groups challenged  
436 this meta-analysis. While we limited our search to Canada, New Zealand, Australia, and the USA, it is  
437 important to recognize the unique and varied Indigenous groups across these countries who, while facing  
438 similar health and social inequities, have distinct cultural, social, and political ways and practices. The  
439 nuances created by heterogeneity in our sample cannot be fully addressed in the scope of this article, nor  
440 is there available data to allow for sub-analyses by distinct Indigenous groups. Further, there are  
441 substantial differences in the healthcare systems in the four included countries, which undoubtedly  
442 influence health outcomes for marginalized groups. Additionally, we used “number of events” rather than  
443 “number of patients” as our population number in the morbidity analysis. Therefore, this study may have  
444 overestimated the independence of each event. A single patient may experience multiple different

445 complications, but these were included in the analysis as independent events per patient, not number of  
446 patients who experienced complications. The results of this study are also limited by the poor quality of  
447 studies available in the literature. Indeed, half of the included studies were judged to be of poor quality,  
448 with a majority being predominantly retrospective in nature and many reporting unadjusted results.  
449 Finally, the lived experiences of diverse Indigenous patients across the world and the true impact of  
450 racism and system inequities in healthcare the outcomes experienced by Indigenous patients cannot fully  
451 be addressed in a meta-analysis of post-surgical outcomes. While out of this study's scope, it is important  
452 to consider the adverse impacts of systemic racism on health status prior to patients undergoing surgery,  
453 including but not limited to disparities in access to culturally appropriate primary and preventative care as  
454 well as lack of timely access to surgical care.

## 455 **CONCLUSION**

456 This study provides evidence that Indigenous patients in Canada, New Zealand, Australia, and the USA  
457 continue to experience worse post-operative outcomes compared to non-Indigenous patients.  
458 Furthermore, despite multiple calls to action on both national and international levels to assess and  
459 address the impacts of colonialism and health inequities for Indigenous populations, the availability of  
460 good quality studies on surgical health of Indigenous patients is limited. In order to address the inequities  
461 in post-operative outcomes for Indigenous Peoples, we must re-imagine models of surgical care that  
462 comprehensively integrate preventative and long-term post-operative care and prioritize accessible,  
463 feasible, and culturally appropriate care for Indigenous groups. Lastly, while there has been a significant  
464 increase in studies focused on and including Indigenous patients since 2017, further research is needed  
465 to investigate the upstream adverse impacts of systemic racism on Indigenous health prior to patients  
466 undergoing surgery.

## 469 **ACKNOWLEDGMENTS**

470 The authors respectfully acknowledge that this review was conducted on Treaty 6 territory, the traditional  
471 land of the Nêhiyawak (Cree), Anishinaabe (Saulteaux), Niitsitapi (Blackfoot), Métis, Dene, and Nakota  
472 Sioux Peoples, the unceded territories of the x̱məθḵəy̱əm (Musqueam), S̱wx̱wú7mesh  
473 (Squamish), səliłwəta̱ (Tsleil-Waututh), and Tsimshian Nations, traditional territory of the Lheidli

476 T'enneh, part of the Dakelh (Carrier) First Nation, as well as the traditional lands of the Sinixt, the  
477 Ktunaxa, the Secwepmec and the Syilxsince in the country now known as Canada since time  
478 immemorial.

479

## 480 REFERENCES

- 481 1. Meara JG, Leather AJM, Hagander L, Alkire BC, Alonso N, Ameh EA, et al. Global  
482 surgery 2030: Evidence and solutions for achieving health, Welfare, and Economic  
483 Development. *International Journal of Obstetric Anesthesia*. 2016;25:75–8.
- 484 2. Shrimme MG, Bickler SW, Alkire BC, Mock C. Global burden of surgical disease: an  
485 estimation from the provider perspective. *Lancet Glob Health*. 2015 Apr;3:S8-S9.
- 486 3. Zuckerman S, Haley J, Roubideaux Y, Lillie-Blanton M. Health Service Access, Use, and  
487 Insurance Coverage Among American Indians/Alaska Natives and Whites: What Role  
488 Does the Indian Health Service Play?. *Am J Public Health*. 2004 Jan;94(1):53-59.
- 489 4. Robson B, Harris R, editors. *Hauora: Māori Standards of Health IV. A study of the years*  
490 *2000–2005*. Wellington: Te Rōpū Rangahau Hauora a Eru Pōmare; 2007.
- 491 5. Valery PC, Coory M, Stirling J, Green AC. Cancer diagnosis, treatment, and survival in  
492 Indigenous and non-Indigenous Australians: a matched cohort study. *Lancet*. 2006  
493 Jun;367(9525):1842-8.
- 494 6. Office of the High Commissioner for Human Rights. About indigenous peoples and  
495 human rights. [https://www.ohchr.org/en/indigenous-peoples/about-indigenous-peoples-](https://www.ohchr.org/en/indigenous-peoples/about-indigenous-peoples-and-human-rights)  
496 [and-human-rights](https://www.ohchr.org/en/indigenous-peoples/about-indigenous-peoples-and-human-rights). Accessed June 27, 2022.
- 497 7. Pulver LJ, Haswell MR, Ring I, et al. *Indigenous Health: Australia, Canada, Aotearoa,*  
498 *New Zealand and the United States: Laying Claim to a Future that Embraces Health for*  
499 *Us All*. Published online 2010
- 500 8. King M, Smith A, Gracey M. Indigenous health part 2: the underlying causes of the health  
501 gap. *Lancet*. 2009 Jul;374(9683):76-85.
- 502 9. Young TK, Reading J, Elias B, O'Neil JD. Type 2 diabetes mellitus in Canada's first  
503 nations: status of an epidemic in progress. *CMAJ*. 2000 Sep;163(5):561-6.
- 504 10. Bourassa C, McKay-McNabb K, Hampton M. Racism, Sexism and Colonialism: The  
505 Impact on the Health of Aboriginal Women in Canada. *Canadian Women Studies*.  
506 2004;24(1):23-29.
- 507 11. Greenwood M, de Leeuw S, Lindsay NM, Reading C, editors. *Determinants of Indigenous*  
508 *Peoples' health in Canada: Beyond the social*. Toronto: Canadian Scholar's Press; 2018
- 509 12. Glenn, EN. *Settler Colonialism as Structure: A Framework for Comparative Studies of*  
510 *U.S. Race and Gender Formation*. *Sociology of Race and Ethnicity*. 2015 Jan;1(1):52–72.
- 511 13. United Nations Department of Economic and Social Affairs [Internet]. 2007 Sep 13  
512 [accessed 2023 Feb 8]. Available from:  
513 [https://www.un.org/development/desa/indigenouspeoples/declaration-on-the-rights-of-](https://www.un.org/development/desa/indigenouspeoples/declaration-on-the-rights-of-indigenous-peoples.html)  
514 [indigenous-peoples.html](https://www.un.org/development/desa/indigenouspeoples/declaration-on-the-rights-of-indigenous-peoples.html)
- 515 14. McLeod M, Signal V, Gurney J, Sarfati D. Postoperative Mortality of Indigenous  
516 Populations Compared With Nonindigenous Populations. *JAMA Surgery*. 2020  
517 Jul;155(7):636-656.
- 518 15. Lehman SJ, Baker RA, Aylward PE, Knight JL, Chew DP. Outcomes of cardiac surgery in  
519 Indigenous Australians. *Med J Aust*. 2009 May;190(10):588-93.
- 520 16. McVicar JA, Poon A, Caron NR, Bould D, Nickerson JW, Ahmad N, et. al. Postoperative  
521 outcomes for Indigenous Peoples in Canada: a systematic review. *CMAJ*. 2021  
522 May;193(20):E713-E722.
- 523 17. Patro N, Li B, Lee Y. Investigating disparities in surgical outcomes in Canadian  
524 Indigenous populations. *Canadian Journal of Surgery*. 2021 Dec;64(6 Suppl 2):S100-  
525 S101.

- 526 18. Tricco AC, Lillie E, Zarin W, O'Brien K, Colquhoun H, Levac D; et al. PRISMA Extension  
527 for Scoping Reviews (PRISMA-ScR): Checklist and Explanation. *Ann Intern Med.* 2018  
528 Oct;169(7):467-473. doi:10.7326/M18-0850
- 529 19. Brooke BS, Schwartz TA, Pawlik TM. MOOSE Reporting Guidelines for Meta-analyses of  
530 Observational Studies. *JAMA Surg.* 2021 Aug;156(8):787-788.  
531 doi:10.1001/jamasurg.2021.0522
- 532 20. Cooke M, Mitrou F, Lawrence D, Guimond E, Beavon D. Indigenous well-being in four  
533 countries: An application of the UNDP's human development index to indigenous peoples  
534 in Australia, Canada, New Zealand, and the United States. *BMC International Health and*  
535 *Human Rights.* 2007 Dec;7(9). doi:10.1186/1472-698x-7-9.
- 536 21. Brave Heart MYH, Chase J, Elkins J, Altschul DB. Historical trauma among indigenous  
537 peoples of the americas: Concepts, research, and clinical considerations. *Journal of*  
538 *Psychoactive Drugs.* 2011 Oct-Dec;43(4):282-290. doi:10.1080/02791072.2011.628913
- 539 22. Hurd K, Barnabe C. Mortality causes and outcomes in indigenous populations of Canada,  
540 the United States, and Australia with rheumatic disease: A systematic review. *Semin*  
541 *Arthritis Rheum.* 2018 Feb;47(4):586-592. doi:10.1016/j.semarthrit.2017.07.009
- 542 23. Wells GA, Shea B, O'Connell D, Peterson J, Welch V, Losos M, et al. The Newcastle-  
543 Ottawa Scale (NOS) for assessing the quality of nonrandomised studies in meta-  
544 analyses. Ottawa Hospital Research Institute. Available from:  
545 [https://www.ohri.ca/programs/clinical\\_epidemiology/oxford.asp](https://www.ohri.ca/programs/clinical_epidemiology/oxford.asp)
- 546 24. Truth and Reconciliation Commission of Canada. Truth and Reconciliation Commission  
547 of Canada: Calls to Action. [cited July 23, 2022]. Available from:  
548 [https://www2.gov.bc.ca/assets/gov/british-columbians-our-governments/indigenous-](https://www2.gov.bc.ca/assets/gov/british-columbians-our-governments/indigenous-people/aboriginal-peoples-documents/calls_to_action_english2.pdf)  
549 [people/aboriginal-peoples-documents/calls\\_to\\_action\\_english2.pdf](https://www2.gov.bc.ca/assets/gov/british-columbians-our-governments/indigenous-people/aboriginal-peoples-documents/calls_to_action_english2.pdf).
- 550 25. American Declaration on the Rights of Indigenous Peoples [Internet]. 2016 Jun 15  
551 [accessed 2023 Feb 8]. Available from:  
552 <https://www.oas.org/en/sare/documents/DecAmIND.pdf>
- 553 26. Hong Z, Wu J, Smart G, Kaita K, Wen SW, Paton S, et al. Survival analysis of liver  
554 transplant patients in Canada 1997–2002. *Transplantation Proceedings.* 2006  
555 Nov;38(9):2951-2956. doi:10.1016/j.transproceed.2006.08.180
- 556 27. Al-Qurayshi Z, Randolph GW, Srivastav S, Aslam R, Friedlander P, Kandil E. Outcomes  
557 in thyroid surgery are affected by racial, economic, and healthcare system demographics.  
558 *Laryngoscope.* 2016 Sep;126(9):2194-2199. doi:10.1002/lary.25871
- 559 28. Amirian H, Torquati A, Omotosho P. Racial disparity in 30-day outcomes of metabolic  
560 and Bariatric Surgery. *Obes Surg.* 2020;30(3):1011-1020. doi:10.1007/s11695-019-  
561 04282-9
- 562 29. Betancourt-Garcia MM, Vatcheva K, Gupta PK, Martinez RD, McCormick JB, Fisher-  
563 Hoch SP, et al. The effect of Hispanic ethnicity on surgical outcomes: An analysis of the  
564 NSQIP database. *Am J Surg.* 2019;217(4):618-633. doi:10.1016/j.amjsurg.2018.10.004
- 565 30. Holleran TJ, Napolitano MA, LaPiano JB, Arnott S, Amdur RL, Brody FJ, et al. Racial  
566 disparities in 30-day outcomes after colorectal surgery in an integrated healthcare  
567 system. *J Gastrointest Surg.* 2022 Feb;26(2):433-443. doi:10.1007/s11605-021-05151-6
- 568 31. Brown O, Geynisman-Tan J, Gillingham A, Collins S, Lewicky-Gaup C, Kenton K, et al.  
569 Minimizing risks in minimally invasive surgery: Rates of surgical site infection across  
570 subtypes of laparoscopic hysterectomy. *J Minim Invasive Gynecol.* 2020 Sep-  
571 Oct;27(6):1370-1376.e1. doi:10.1016/j.jmig.2019.10.015

- 572 32. Causey MW, McVay D, Hatch Q, Johnson E, Maykel JA, Champagne B, et al. The  
573 impact of race on outcomes following emergency surgery: An American College of  
574 Surgeons National Surgical Quality Improvement Program Assessment. *Am J Surg.* 2013  
575 Aug;206(2):172-179. doi:10.1016/j.amjsurg.2012.11.022
- 576 33. Chen Y-W, Fong ZV, Qadan M, Kunitake H, Mullen JT, Chang DC. Should all patients  
577 receive the same prophylaxis? racial variation in the risk of venous thromboembolism  
578 after major abdominal operations. *Am J Surg.* 2021 Nov;222(5):884-889.  
579 doi:10.1016/j.amjsurg.2021.05.020
- 580 34. Chertack N, Baky F, Samplaski MK, Vij SC, Bakare T. The impact of race and gender on  
581 30-day urologic surgery complications. *Urology.* 2022 Apr;162:77-83.  
582 doi:10.1016/j.urology.2021.05.023
- 583 35. Elahi M, Matata B, Yii M. Ethnicity and adverse operative outcomes among Australian  
584 patients undergoing first-time isolated coronary artery bypass graft surgery. *Int Surg.*  
585 2008 Nov;93(6):358-365
- 586 36. Goulet S, Trepman E, Mmath MC, Koulack J, Fong H, Duerksen F, et al.  
587 Revascularization for peripheral vascular disease in Aboriginal and non-Aboriginal  
588 patients. *J Vasc Surg.* 2006 Apr;43(4):735-741. doi:10.1016/j.jvs.2005.11.058
- 589 37. Kamaraju A, Feinn R, Myrick K, Halawi MJ. Total versus Unicondylar Knee Arthroplasty:  
590 Does race play a role in the treatment selection? *J Racial Ethn Health Disparities.* 2022  
591 Oct;9(5):1845-1849. doi:10.1007/s40615-021-01120-6
- 592 38. Majoni SW, Ullah S, Collett J, Hughes JT, McDonald S. Weight change trajectories in  
593 Aboriginal and Torres Strait Islander australians after Kidney Transplantation: A cohort  
594 analysis using the Australia and New Zealand dialysis and Transplant Registry  
595 (ANZDATA). *BMC Nephrol.* 2019 Jun;20(1):232. doi:10.1186/s12882-019-1411-1
- 596 39. Page S, Yong MS, Saxena P, Yadav S. Outcomes in dialysis-dependent indigenous and  
597 Non-Indigenous patients undergoing cardiac surgery at Townsville University Hospital.  
598 *Heart Lung Circ.* 2021 Aug;30(8):1200-1206. doi:10.1016/j.hlc.2021.02.013
- 599 40. Prabhu A, Tully PJ, Bennetts JS, Tuble SC, Baker RA. The morbidity and mortality  
600 outcomes of Indigenous Australian peoples after isolated coronary artery bypass graft  
601 surgery: The influence of geographic remoteness. *Heart Lung Circ.* 2013 Aug;22(8):599-  
602 605. doi:10.1016/j.hlc.2013.01.003
- 603 41. Rogers NM, Lawton PD, Jose MD. Plasma cell infiltrates and renal allograft outcomes in  
604 indigenous and non-indigenous people of the Northern Territory of Australia. *Nephrology*  
605 (Carlton). 2011 Nov;16(8):777-783. doi:10.1111/j.1440-1797.2011.01487.x
- 606 42. Sanford Z, Taylor H, Fiorentino A, Broda A, Zaidi A, Turcotte J, et al. Racial disparities in  
607 surgical outcomes after spine surgery: An ACS-NSQIP analysis. *Global Spine J.* 2019  
608 Sep;9(6):583-590. doi:10.1177/2192568218811633
- 609 43. Seipp R, Zhang N, Nair SS, Khamash H, Sharma A, Leischow S, et al. Patient and  
610 allograft outcomes after kidney transplant for the indigenous patients in the United States.  
611 *PLoS One.* 2021 Feb;16(2):e0244492. doi:10.1371/journal.pone.0244492
- 612 44. Sood MM, Tangri N, Komenda P, Rigatto C, Khojah S, Hiebert B, et al. Incidence, secular  
613 trends, and outcomes of cardiac surgery in Aboriginal Peoples. *Can J Cardiol.* 2013  
614 Dec;29(12):1629-1636. doi:10.1016/j.cjca.2013.06.003



- 615 45. Storsley LJ, Young A, Rush DN, Nickerson PW, Ho J, Suon V, et al. Long-term medical  
616 outcomes among Aboriginal Living Kidney Donors. *Transplantation*. 2010 Aug;90(4):401-  
617 406. doi:10.1097/tp.0b013e3181e6e79b
- 618 46. Swart EM, Sarfati D, Cunningham R, Dennett E, Signal V, Gurney J, et. al. Ethnicity and  
619 rectal cancer management in New Zealand. *N Z Med J*. 2013 Oct;126(1384):42-52.
- 620 47. Treacy PJ, Chatfield MD, Bessell J. Is gastric banding appropriate in indigenous or  
621 remote-dwelling persons? *Obes Surg*. 2016 Aug;26(8):1728-1734. doi:10.1007/s11695-  
622 015-1993-z
- 623 48. Wang TKM, Wei D, Evans T, Ramanathan T, Haydock D. Comparison of characteristics  
624 and outcomes for type A aortic dissection surgery by Māori, Pasifika or other ethnicities.  
625 *N Z Med J*. 2020 May;133(1514):33-40.
- 626 49. Wiley HRL, Varilek BM, Saucedo-Crespo H, Sakpal SV, Auvenshine C, Steers J, et al.  
627 Kidney Transplant Outcomes in indigenous people of the Northern Great Plains of the  
628 United States. *Transplant Proc*. 2021 Jul-Aug;53(6):1872-1879.  
629 doi:10.1016/j.transproceed.2021.05.003
- 630 50. Wu J, Ebrahim AK. Ethnic disparities for thyroid surgery. *ANZ J Surg*. 2020  
631 Dec;90(12):2527-2531. doi:10.1111/ans.16410
- 632 51. Anderson E, Glogoza M, Bettenhausen A, Guenther R, Dangerfield D, Jansen R, et al.  
633 Disparities in cardiovascular risk factors in northern plains American Indians undergoing  
634 coronary artery bypass grafting. *Health Equity*. 2018 Aug;2(1):152-160.  
635 doi:10.1089/heq.2018.002
- 636 52. Boyd BAJ, Winkelman WD, Mishra K, Vittinghoff E, Jacoby VL. Racial and ethnic  
637 differences in reconstructive surgery for apical vaginal prolapse. *Am J Obstet Gynecol*.  
638 2021 Oct;225(4):405.e1-405.e7. doi:10.1016/j.ajog.2021.05.002
- 639 53. Ezomo OT, Sun D, Gronbeck C, Harrington MA, Halawi MJ. Where do we stand today on  
640 racial and ethnic health disparities? an analysis of primary total hip arthroplasty from a  
641 2011–2017 national database. *Arthroplast Today*. 2020 Dec;6(4):872-876.  
642 doi:10.1016/j.artd.2020.10.002
- 643 54. Sequist TD, Narva AS, Stiles SK, Karp SK, Cass A, Ayanian JZ. Access to renal  
644 transplantation among American Indians and Hispanics. *Am J Kidney Dis*. 2004  
645 Aug;44(2):344-352. doi:10.1053/j.ajkd.2004.04.039
- 646 55. Singleton N, Buddicom E, Vane A, Poutawera V. Are there differences between Maori  
647 and non-Maori patients undergoing primary total hip and knee arthroplasty surgery in  
648 New Zealand? A registry-based cohort study. *N Z Med J*. 2013 Aug;126(1379):23-30
- 649 56. Zafar S, Dun C, Srikumaran D, Wang P, Schein OD, Makary M, et al. Endophthalmitis  
650 rates among Medicare beneficiaries undergoing cataract surgery between 2011 and  
651 2019. *Ophthalmology*. 2022 Mar;129(3):250-257. doi:10.1016/j.ophtha.2021.09.004
- 652 57. Amirian H, Torquati A, Omotosho P. Racial disparity in 30-day outcomes of metabolic  
653 and Bariatric Surgery. *Obes Surg*. 2020 Mar;30(3):1011-1020. doi:10.1007/s11695-019-  
654 04282-9
- 655 58. Betancourt-Garcia MM, Vatcheva K, Gupta PK, Martinez RD, McCormick JB, Fisher-  
656 Hoch SP, et al. The effect of Hispanic ethnicity on surgical outcomes: An analysis of the

- 657 NSQIP database. *Am J Surg*. 2019 Apr;217(4):618-633.  
658 doi:10.1016/j.amjsurg.2018.10.004
- 659 59. Shah BR, Frymire E, Jacklin K, Jones CR, Khan S, Slater M, et al. Peripheral arterial  
660 disease in ontario first nations people with diabetes: A longitudinal population-based  
661 cohort study. *CMAJ Open*. 2019 Dec;7(4):E700-E705. doi:10.9778/cmajo.20190162
- 662 60. Mordhorst TR, Jalali A, Nelson R, Brodke DS, Spina N, Spiker WR. Cost analysis of  
663 primary single-level lumbar discectomies using the value driven outcomes database in a  
664 large academic center. *Spine J*. 2021 Aug;21(8):1309-1317.  
665 doi:10.1016/j.spinee.2021.03.017
- 666 61. Manatū Hauora - Ministry of Health [Internet]. [Cited 2022 Jul 22]. Available from:  
667 <https://www.health.govt.nz/>.
- 668 62. Shaw C, Blakely T, Sarfati D, Fawcett J, Hill S. Varying evolution of the New Zealand  
669 lung cancer epidemic by ethnicity and socioeconomic position (1981-1999). *N Z Med J*.  
670 2005 Apr;118(1213):U1411
- 671 63. Stefani LC, Hajjar L, Biccard B, Pearse RM. The need for data describing the surgical  
672 population in Latin America. *Br J Anaesthesia*. 2022 Jul;129(1):10-12. doi:  
673 10.1016/j.bja.2022.02.029.
- 674 64. O'Brien P, Bunzli S, Lin I, Bessarab D, Coffin J, Dowsey MM, et al. Addressing surgical  
675 inequity for Aboriginal and Torres Strait Islander people in Australia's universal health  
676 care system: a call to action. *ANZ J Surg*. 2021 Mar;91(3):238-44.
- 677 65. Zhang W, Lyman S, Boutin-Foster C, Parks ML, Pan TJ, Lan A, et. al. Racial and Ethnic  
678 Disparities in Utilization Rate, Hospital Volume, and Perioperative Outcomes After Total  
679 Knee Arthroplasty. *J Bone Joint Surg Am*. 2016 Aug;98(15):1243-52. doi:  
680 10.2106/JBJS.15.01009. [Erratum in: *J Bone Joint Surg Am*. 2017;99(6):e30]
- 681 66. American College of Surgeons - National Surgical Quality Improvement Program  
682 [Internet]. Chicago, IL; Date unknown [accessed 2023 Feb 8]. Available from:  
683 <https://www.facs.org/quality-programs/data-and-registries/acs-nsqip/>
- 684 67. Bodkin-Andrews G, Carlson B. The legacy of racism and Indigenous Australian identity  
685 within education. *Race Ethnicity and Education*. 2014 Nov;19(4):784-807, DOI:  
686 10.1080/13613324.2014.969224
- 687 68. King M Smith A Gracey M. Indigenous health part 2: the underlying causes of the health  
688 gap. *Lancet*. 2009 Jul;374:76–85.
- 689 69. Horrill T, McMillan DE, Schultz ASH, Thompson G. Understanding access to healthcare  
690 among Indigenous peoples: A comparative analysis of biomedical and postcolonial  
691 perspectives. *Nurs Inq*. 2018 Jul;25(3):e12237. doi: 10.1111/nin.12237.
- 692 70. Research will help Aboriginal patients. *Koori Mail*. 2011 April;499:67. Available from:  
693 [https://aiatsis.gov.au/collection/featured-collections/koori-](https://aiatsis.gov.au/collection/featured-collections/koori-mail?combine=2011&items_per_page=24)  
694 [mail?combine=2011&items\\_per\\_page=24](https://aiatsis.gov.au/collection/featured-collections/koori-mail?combine=2011&items_per_page=24)
- 695 71. Wakewich P, Wood B, Davey C, Laframboise A, Zehbe I. Colonial legacy and the  
696 experience of First Nations women in cervical cancer screening: A Canadian  
697 multicomunity study. *Crit Public Health*. 2016 Jan;26(4):368–380.  
698 <https://doi.org/10.1080/09581596.2015.1067671>

- 699  
700  
701
72. Betancourt JR, Green A, Carrillo JE, et. al. Defining cultural competence: a practical framework for addressing racial/ethnic disparities in health and health care. Public Health Rep. 2003 Jul-Aug;118(4):293–302.

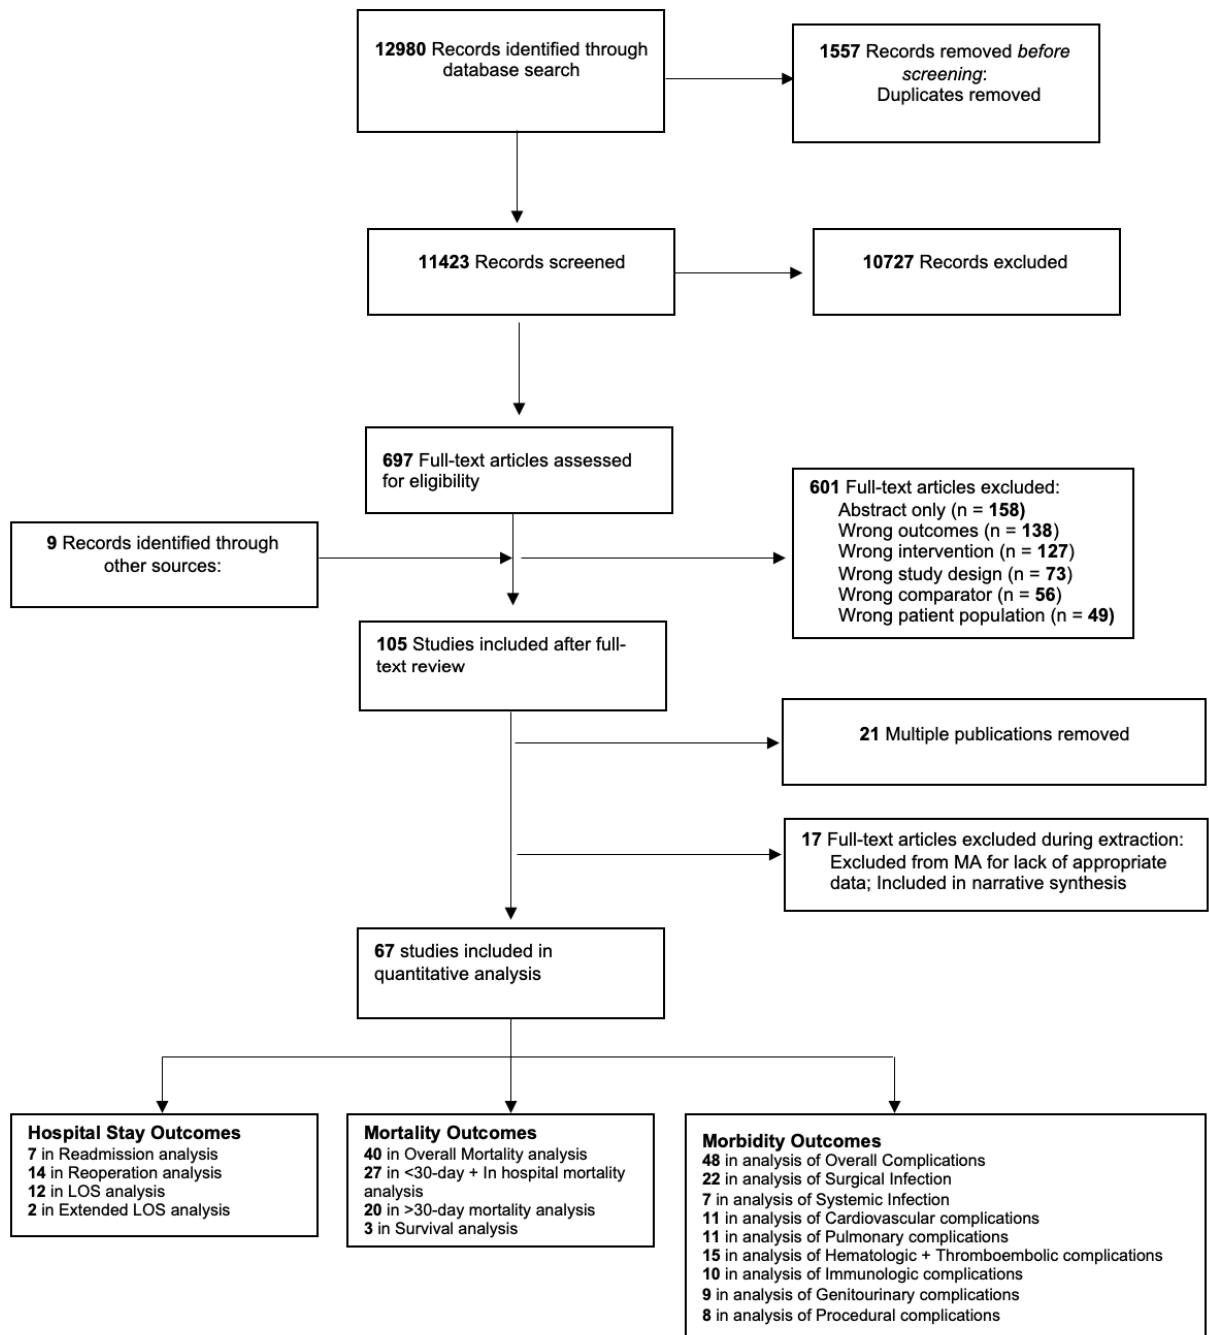

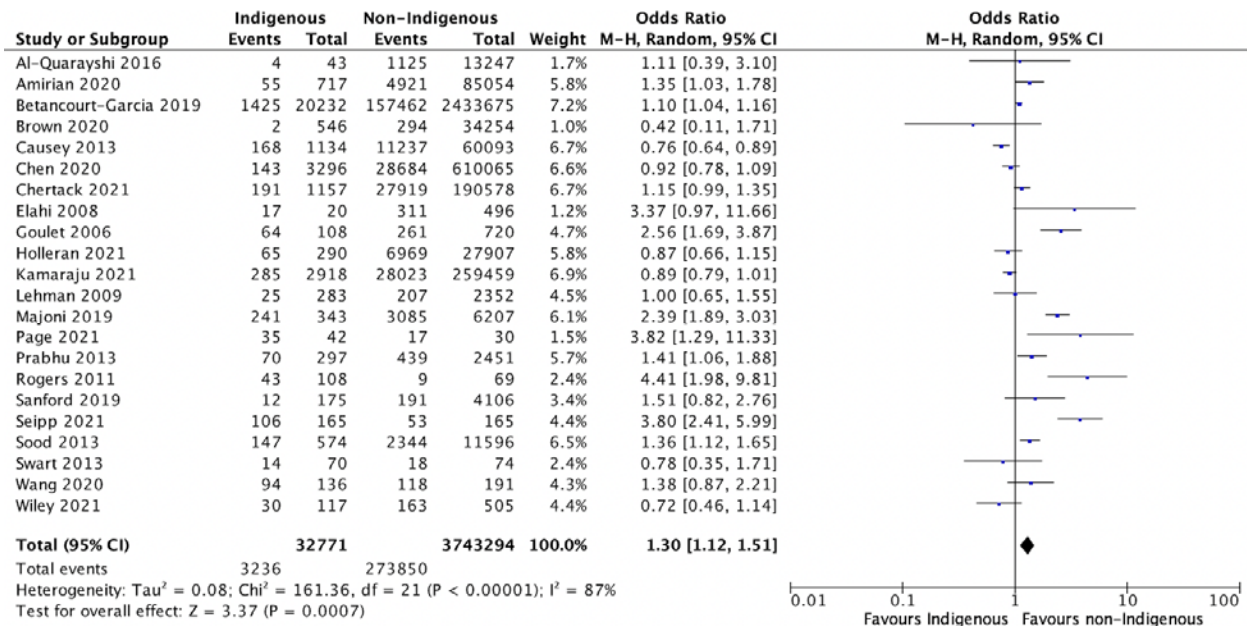

(A)

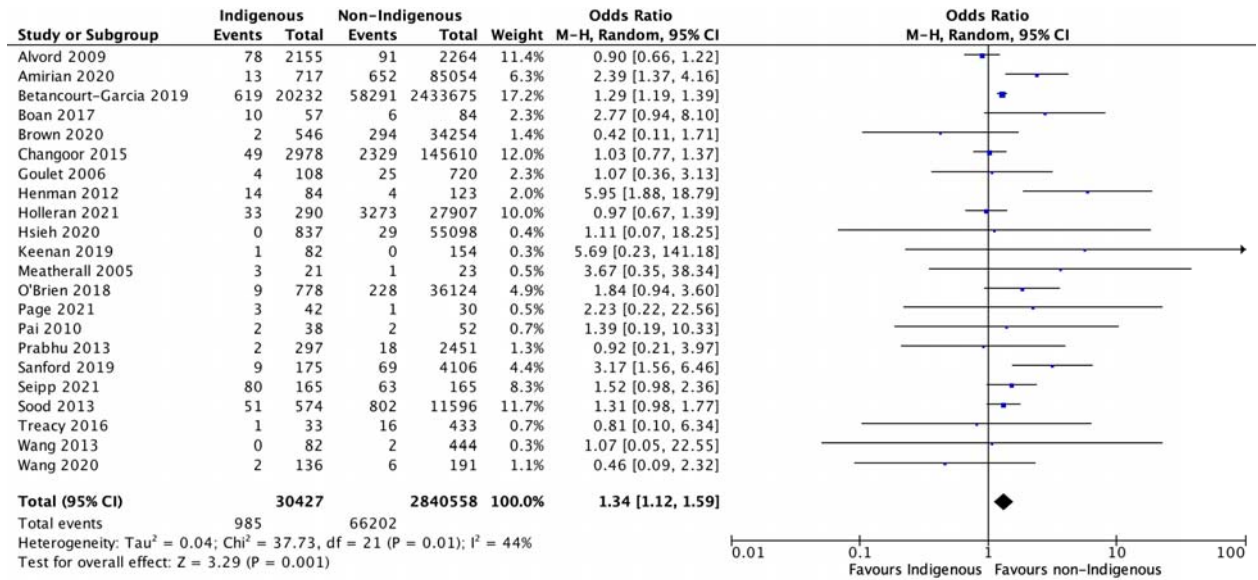

(B)

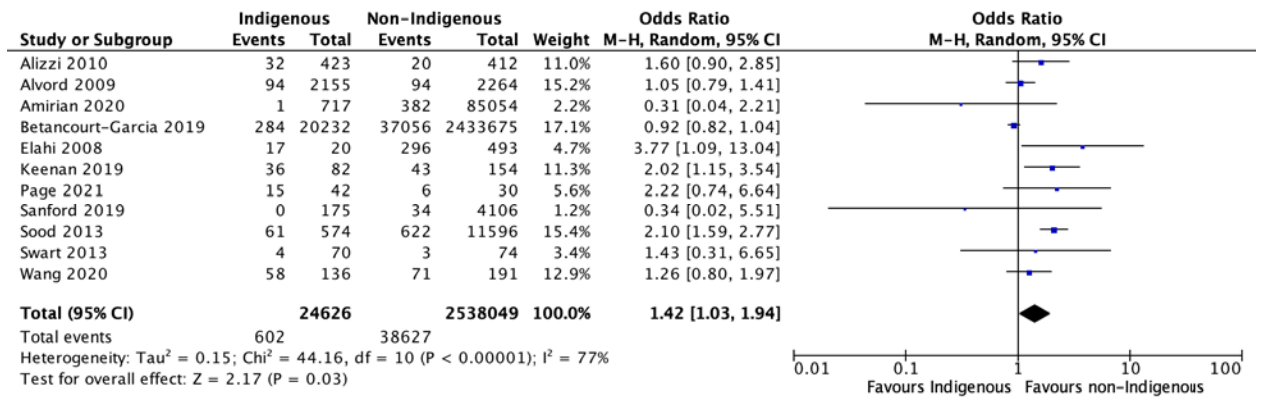

(C)

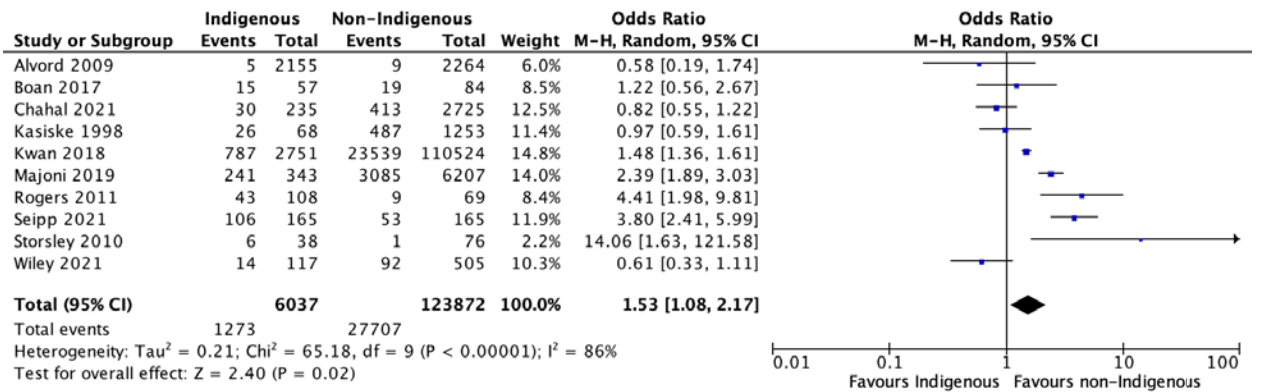

Source: https://www.medrxiv.org/content/10.1101/2023.03.27.23287510v1.full.pdf
